# Supplementary material for: Equilibrium acidities of BINOL type chiral phenolic hydrogen bonding donors in DMSO
Source: Royal Society of Chemistry journal article supplement (doi:10.1039/c6qo00252h), 2016-01-01
Supplement: c6qo00252h1.pdf [file c6qo00252h1.pdf]

Supporting Information for:

**Equilibrium Acidities of BINOL Type Chiral Phenolic  
Hydrogen Bonding Donors in DMSO**

Xiang Ni,<sup>a,b</sup> Xin Li<sup>a,b</sup>\*, Zhen Li<sup>a,b</sup> and Jin-Pei Cheng<sup>b,c</sup>

<sup>a</sup> State Key Laboratory of Elemento-Organic Chemistry, Department of Chemistry, <sup>b</sup> Collaborative  
Innovation Center of Chemical Science and Engineering, Nankai University, Tianjin 300071, <sup>c</sup>  
Center of Basic Molecular Science, Department of Chemistry, Tsinghua University, Beijing  
100084.

xin\_li@nankai.edu.cn

## UV/Vis spectra of the HIn anion in DMSO

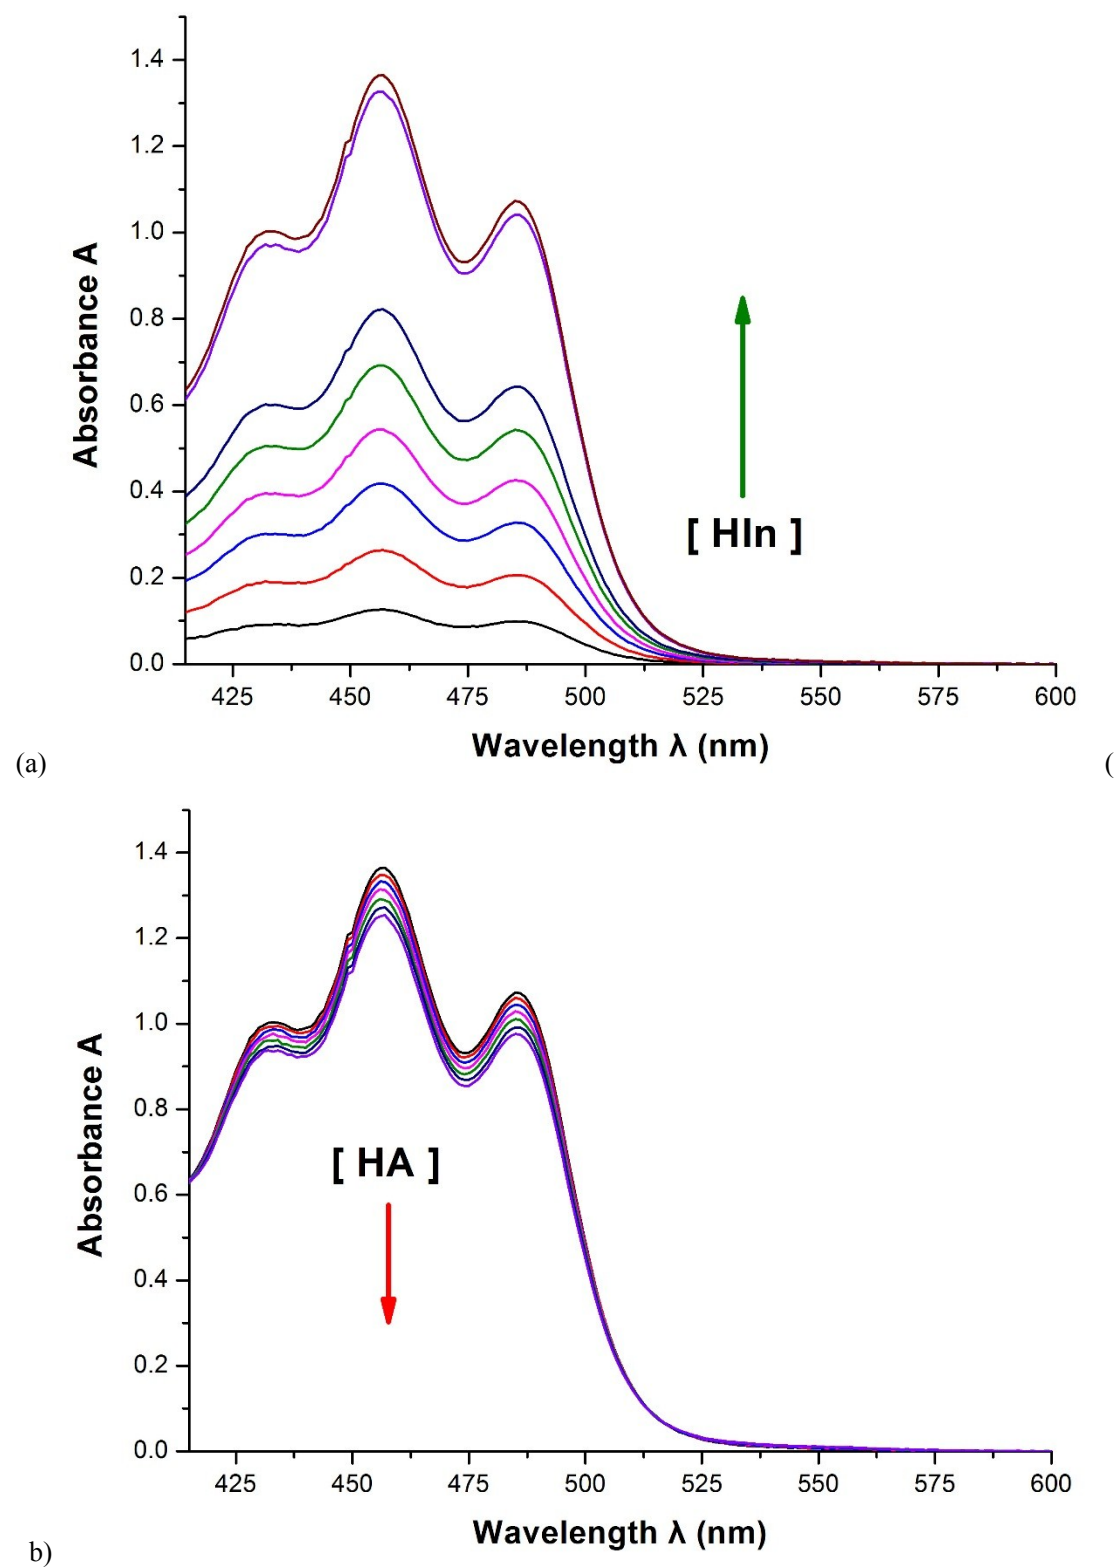

**Figure 1.** (a) Absorption spectra of the anion derived from **2,7-diBr-9-PhS-FH** for various added amounts of **2,7-diBr-9-PhS-FH** during the titration. (b) Absorption spectra of the anion derived from **2,7-diBr-9-PhS-FH** for various added amounts of catalyst **2** during the titration.

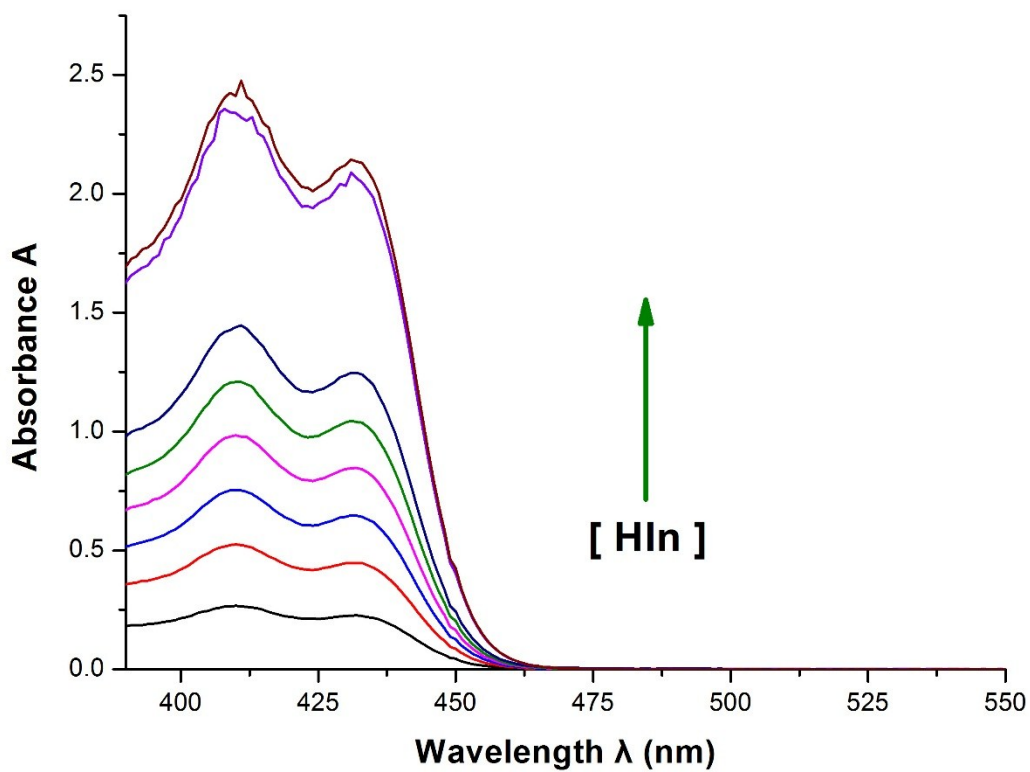

(a)

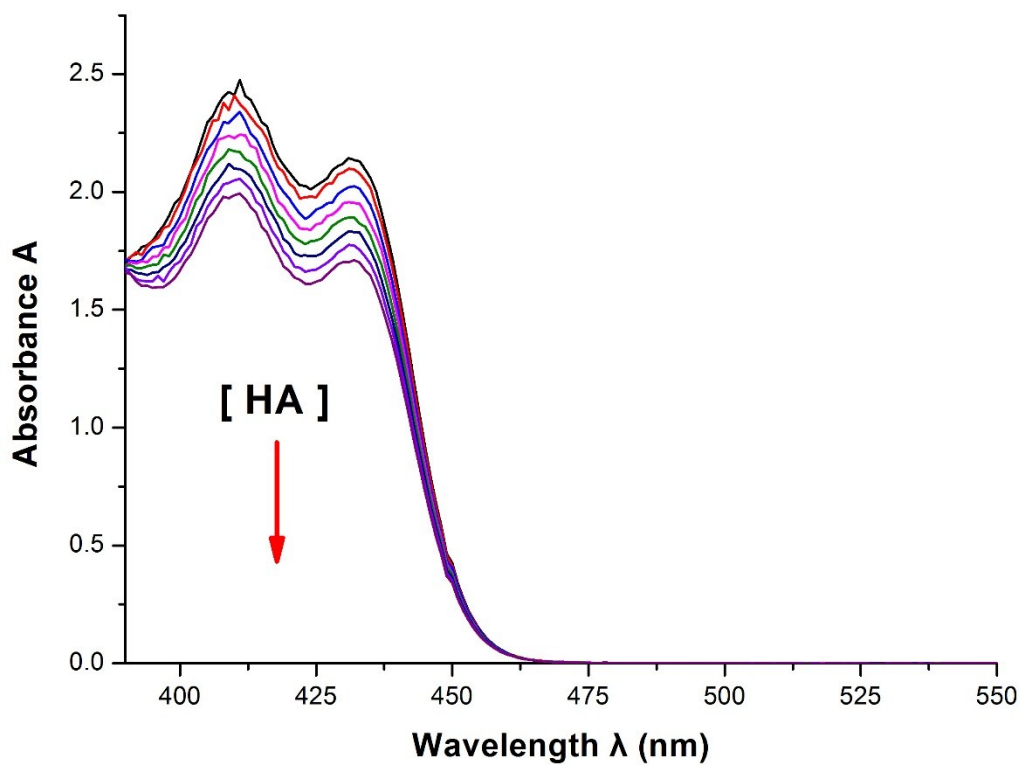

(b)

**Figure 2.** (a) Absorption spectra of the anion derived from 9-CO<sub>2</sub>Me-FH for various added amounts of 9-CO<sub>2</sub>Me-FH during the titration. (b) Absorption spectra of the anion derived from 9-CO<sub>2</sub>Me-FH for various added amounts of catalyst 3 during the titration.

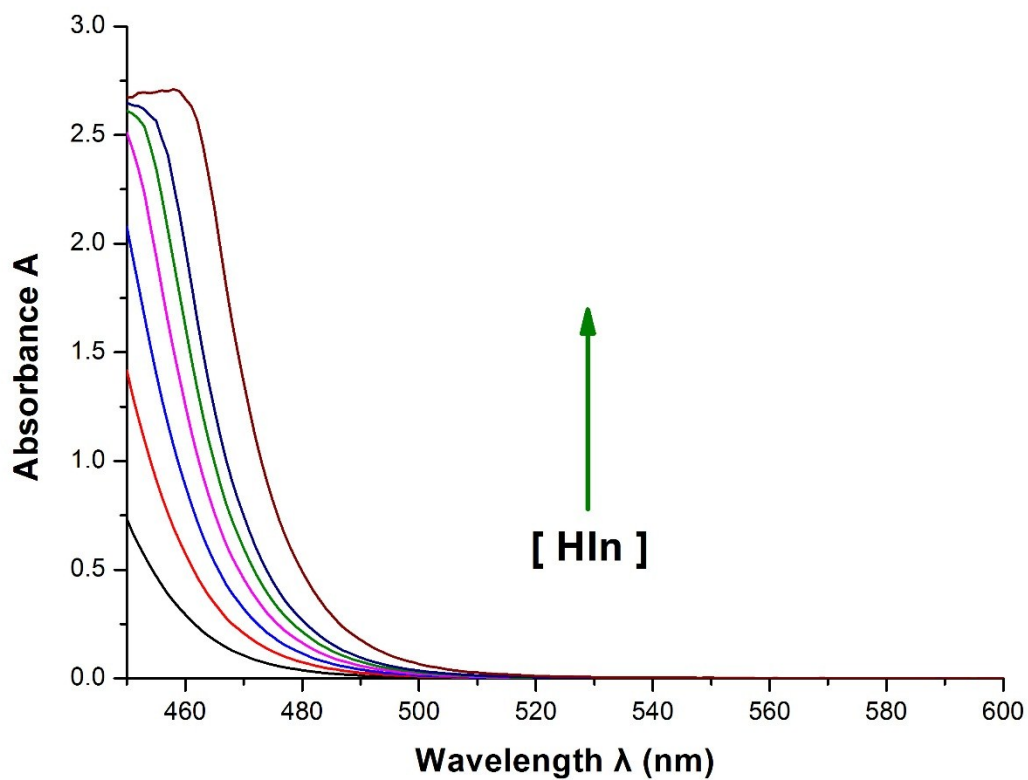

(a)

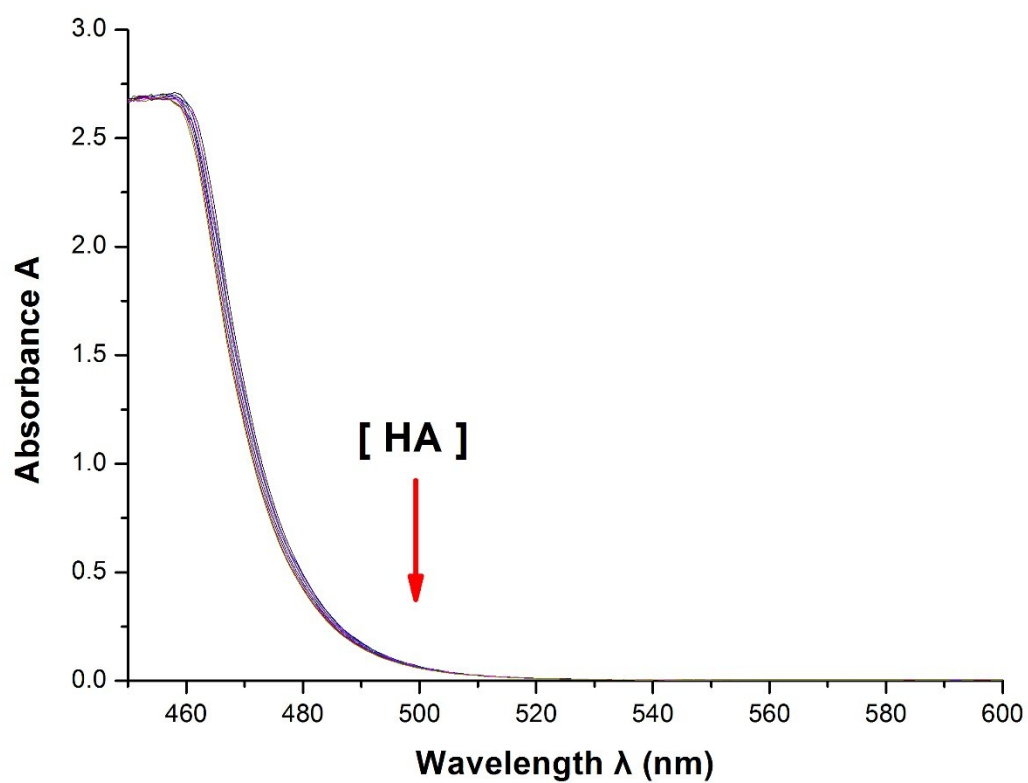

(b)

**Figure 3.** (a) Absorption spectra of the anion derived from **4-NO<sub>2</sub>-3-CF<sub>3</sub>-phenol** for various added amounts of **4-NO<sub>2</sub>-3-CF<sub>3</sub>-phenol** during the titration. (b) Absorption spectra of the anion derived from **4-NO<sub>2</sub>-3-CF<sub>3</sub>-phenol** for various added amounts of catalyst **4** during the titration.

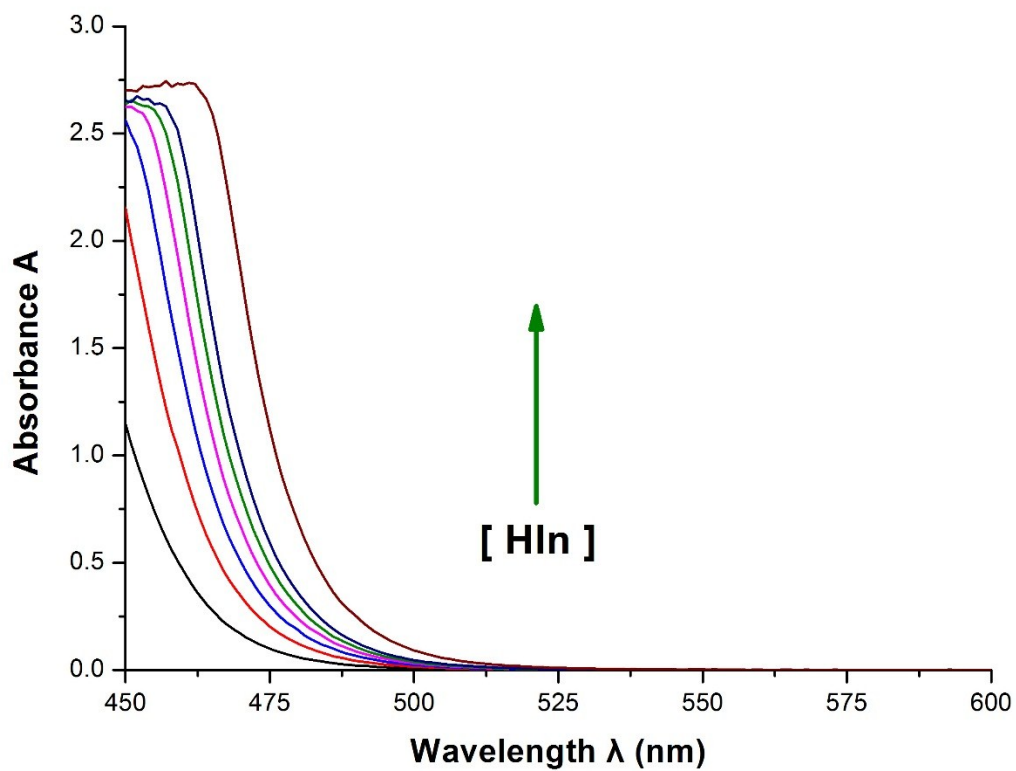

(a)

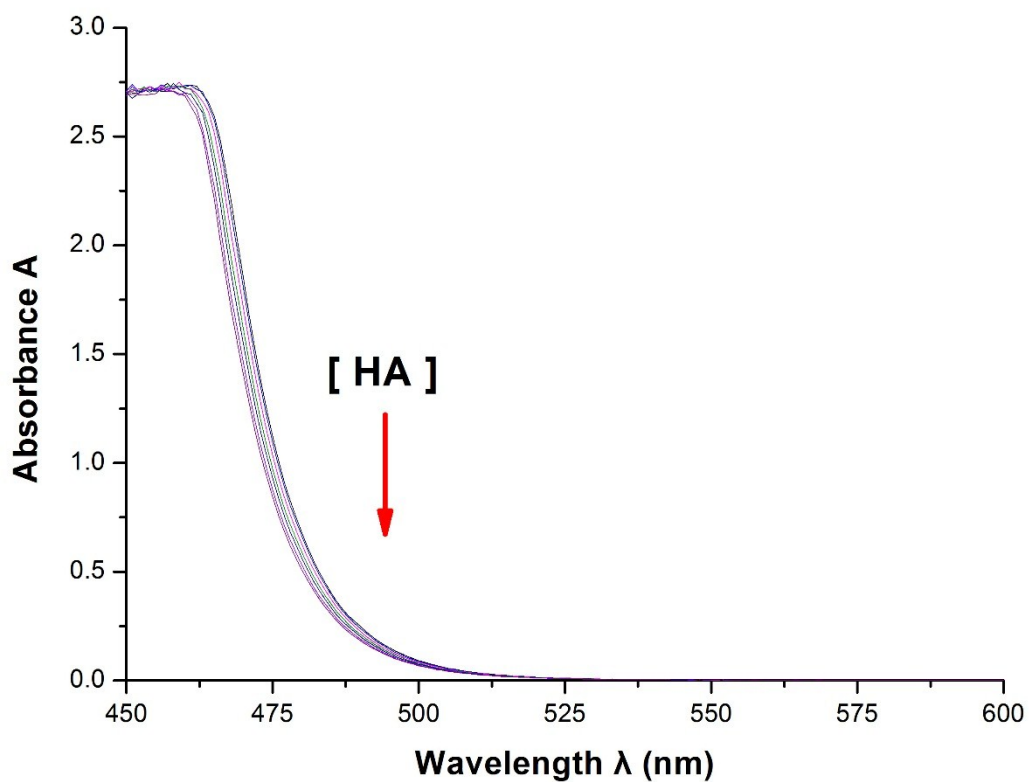

(b)

**Figure 4.** (a) Absorption spectra of the anion derived from **4-NO<sub>2</sub>-3-CF<sub>3</sub>-phenol** for various added amounts of **4-NO<sub>2</sub>-3-CF<sub>3</sub>-phenol** during the titration. (b) Absorption spectra of the anion derived from **4-NO<sub>2</sub>-3-CF<sub>3</sub>-phenol** for various added amounts of catalyst **5** during the titration.

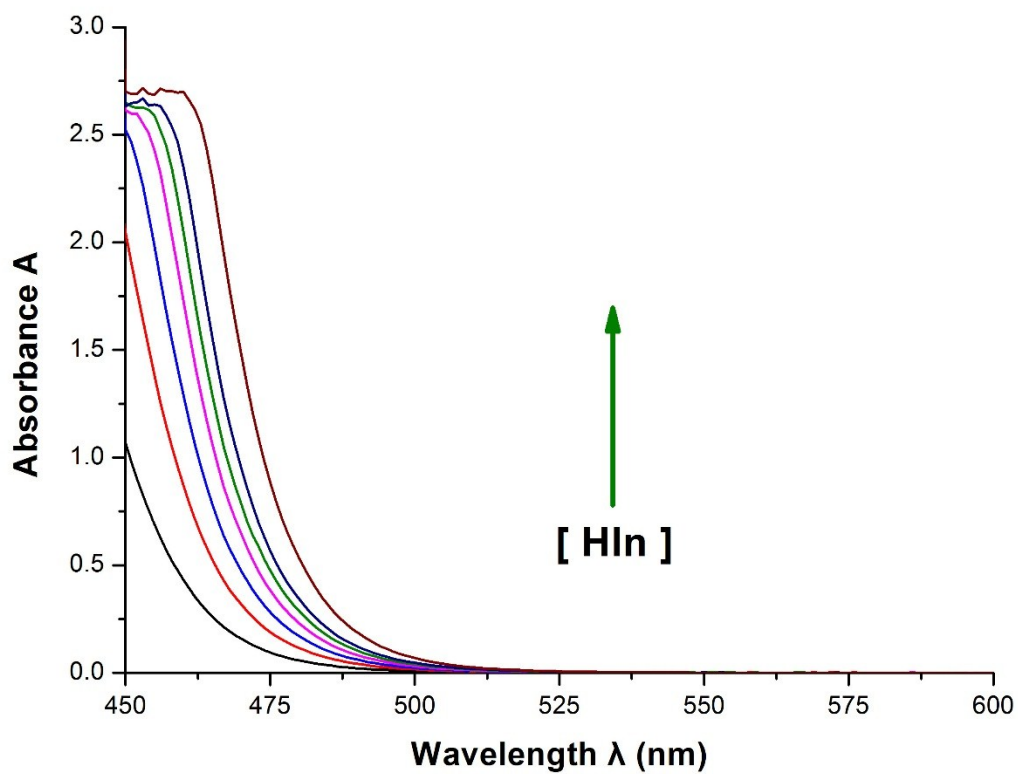

(a)

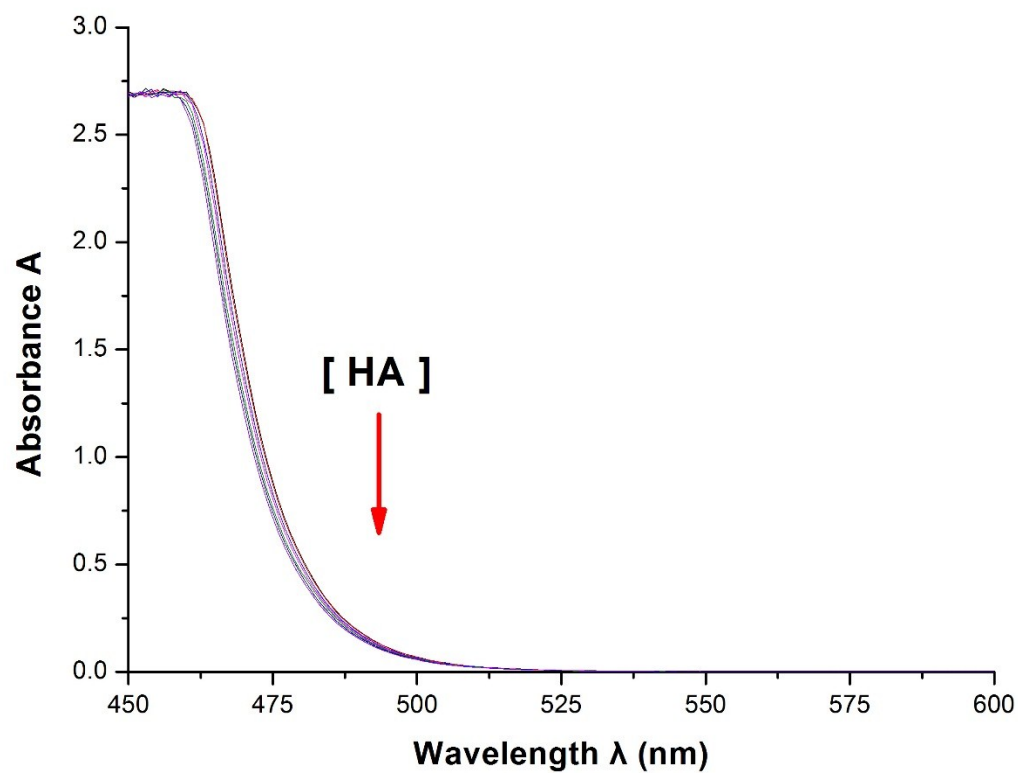

(b)

**Figure 5.** (a) Absorption spectra of the anion derived from **4-NO<sub>2</sub>-3-CF<sub>3</sub>-phenol** for various added amounts of **4-NO<sub>2</sub>-3-CF<sub>3</sub>-phenol** during the titration. (b) Absorption spectra of the anion derived from **4-NO<sub>2</sub>-3-CF<sub>3</sub>-phenol** for various added amounts of catalyst **6** during the titration.

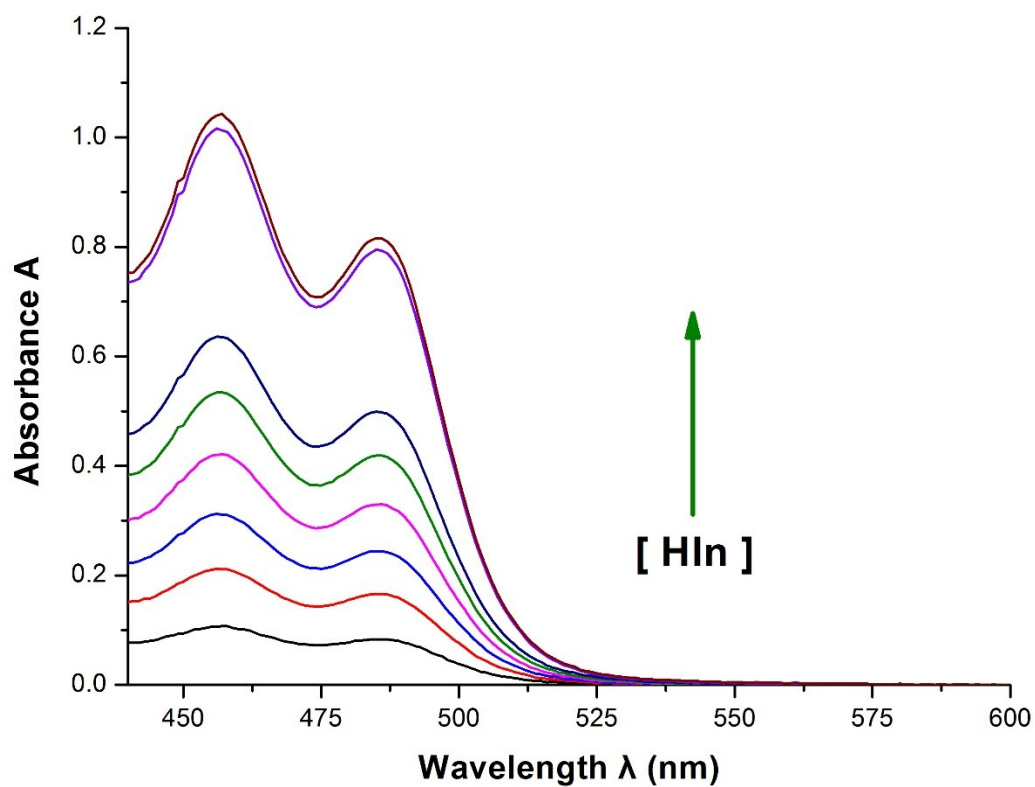

(a)

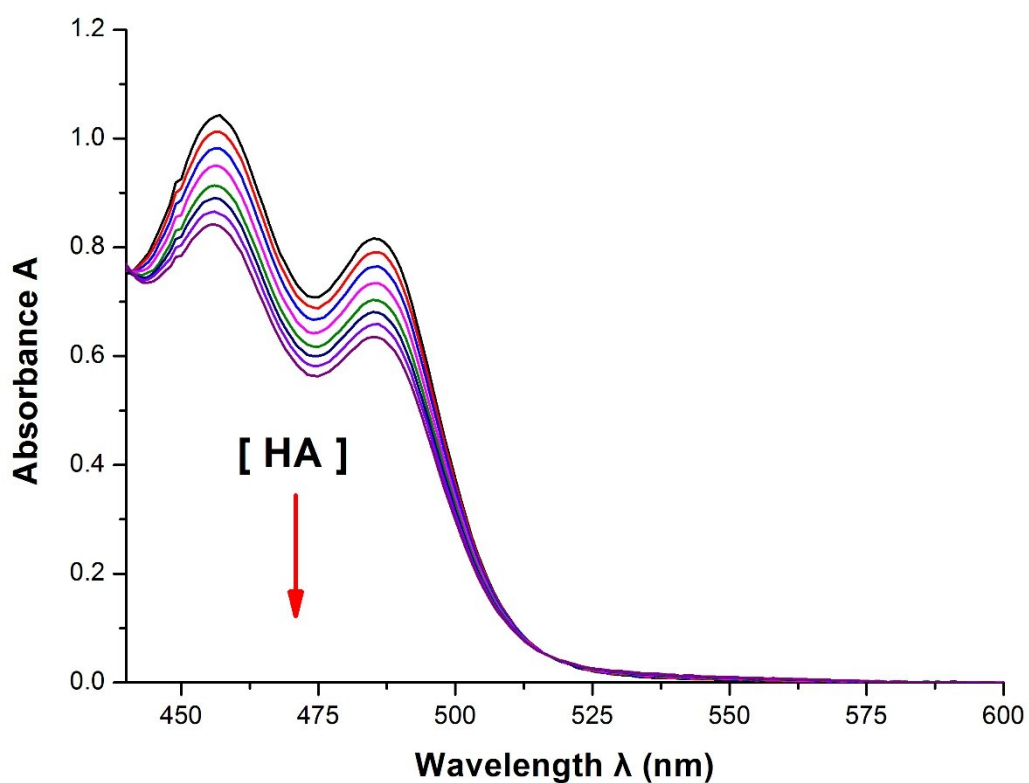

(b)

**Figure 6.** (a) Absorption spectra of the anion derived from 2,7-diBr-9-PhS-FH for various added amounts of 2,7-diBr-9-PhS-FH during the titration. (b) Absorption spectra of the anion derived from 2,7-diBr-9-PhS-FH for various added amounts of catalyst 7 during the titration.

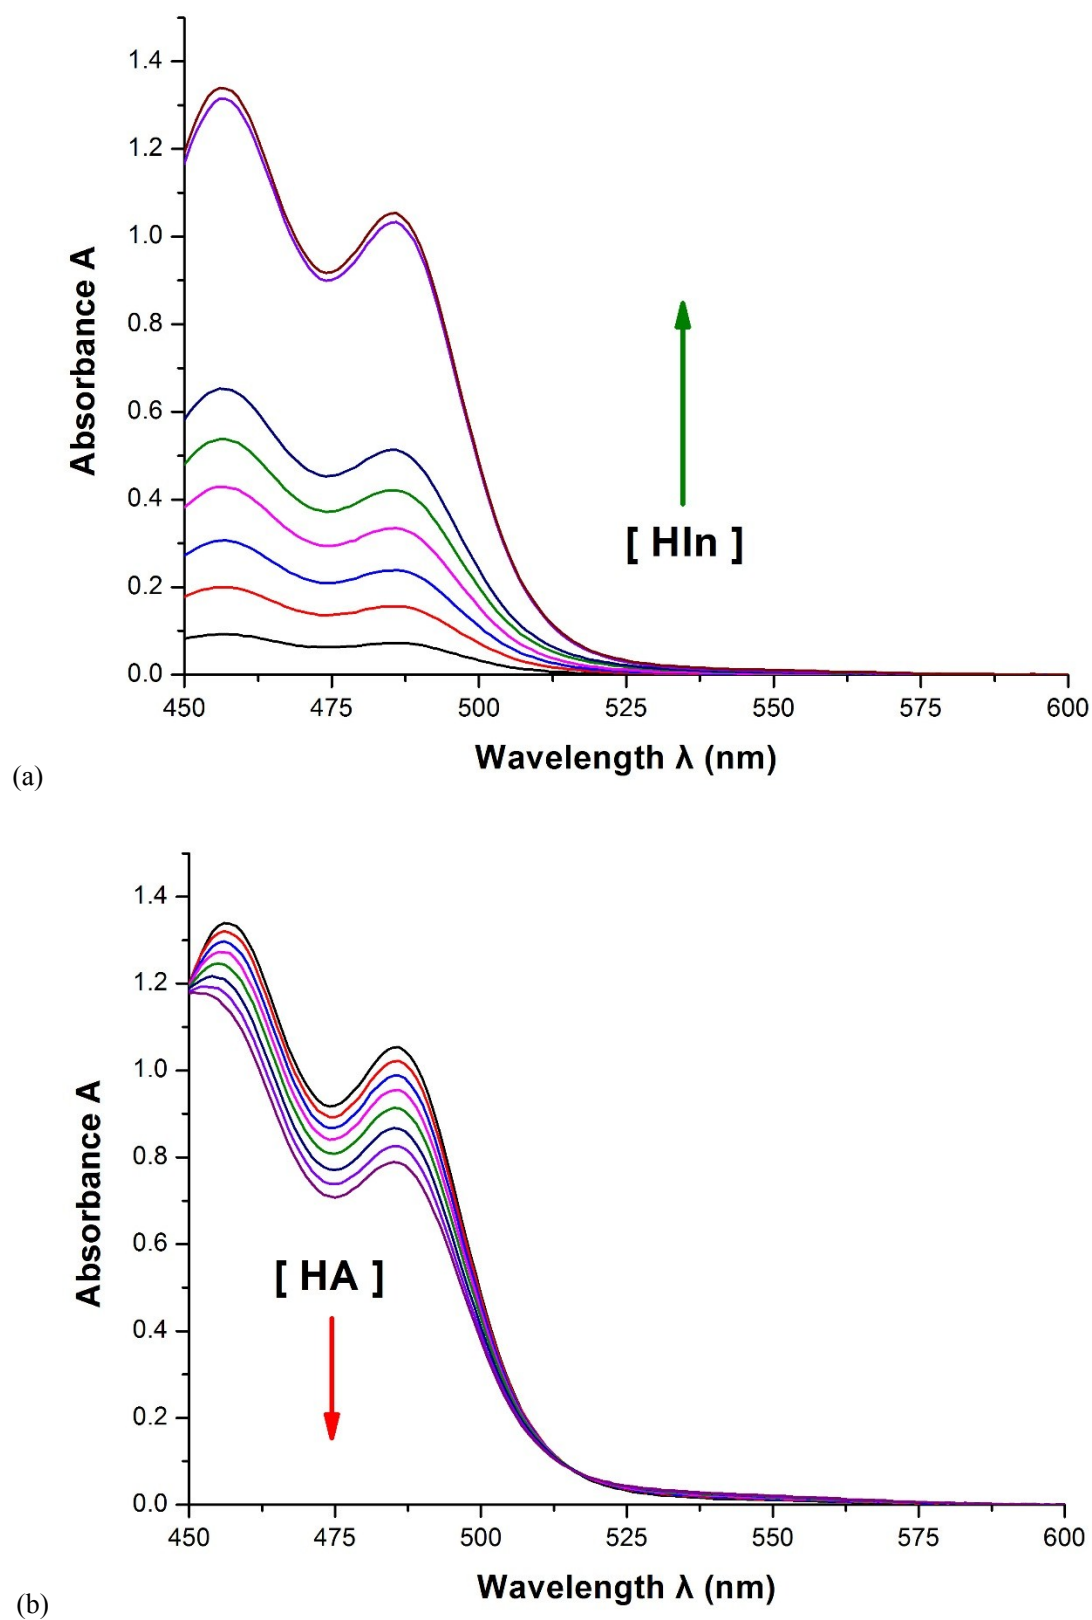

**Figure 7.** (a) Absorption spectra of the anion derived from **2,7-diBr-9-PhS-FH** for various added amounts of **2,7-diBr-9-PhS-FH** during the titration. (b) Absorption spectra of the anion derived from **2,7-diBr-9-PhS-FH** for various added amounts of catalyst **8** during the titration.



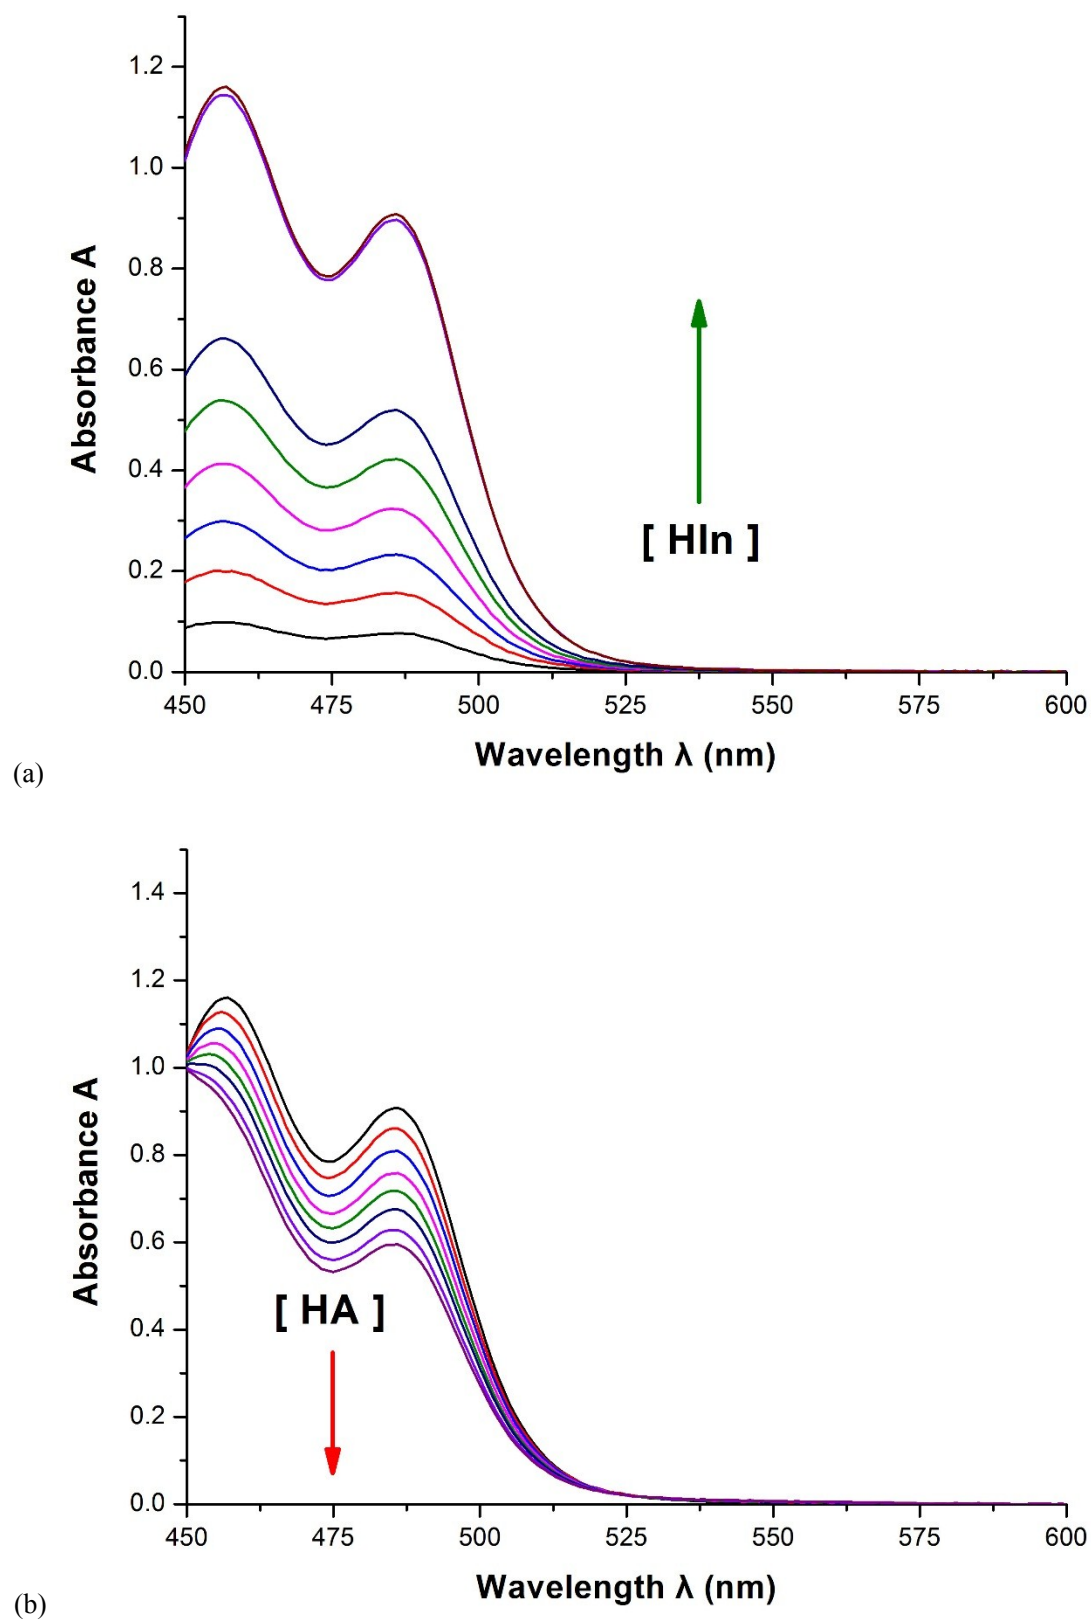

**Figure 8.** (a) Absorption spectra of the anion derived from **2,7-diBr-9-PhS-FH** for various added amounts of **2,7-diBr-9-PhS-FH** during the titration. (b) Absorption spectra of the anion derived from **2,7-diBr-9-PhS-FH** for various added amounts of catalyst **11** during the titration.

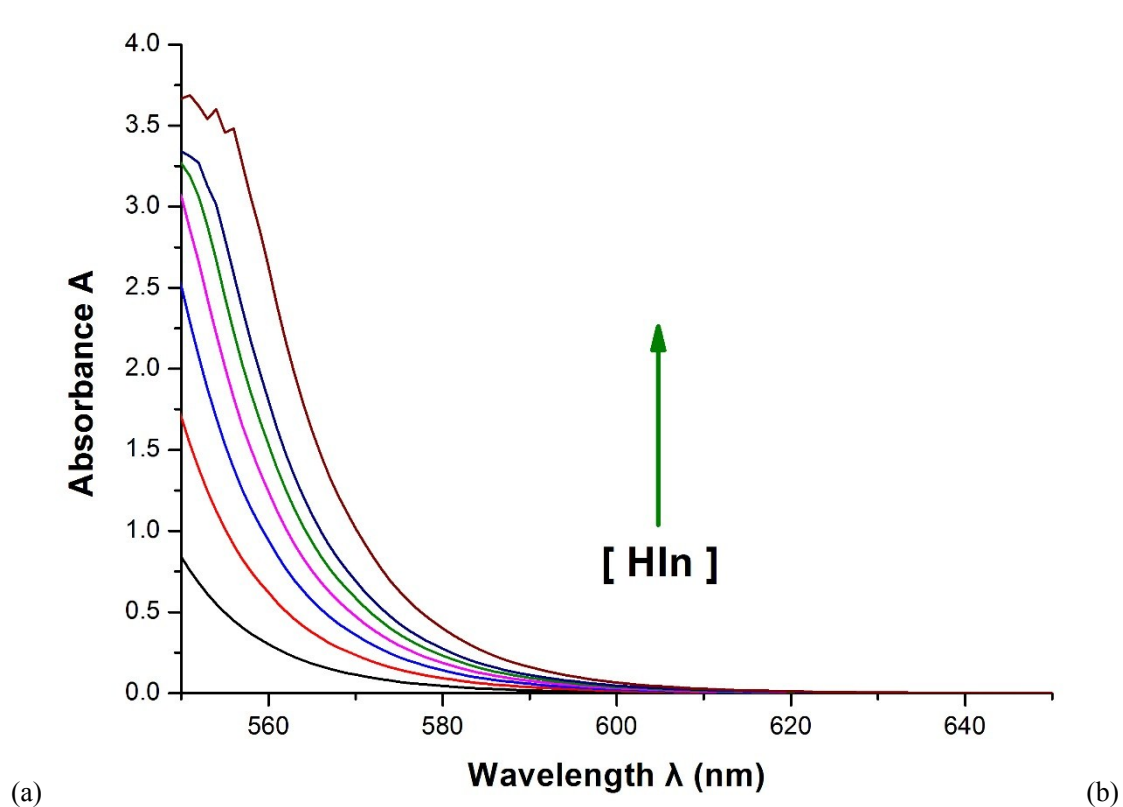

**Figure 9.** (a) Absorption spectra of the anion derived from **9-(2-Cl-Ph)-NHN-FH** for various added amounts of **9-(2-Cl-Ph)-NHN-FH** during the titration. (b) Absorption spectra of the anion derived from **9-(2-Cl-Ph)-NHN-FH** for various added amounts of catalyst **12** during the titration.

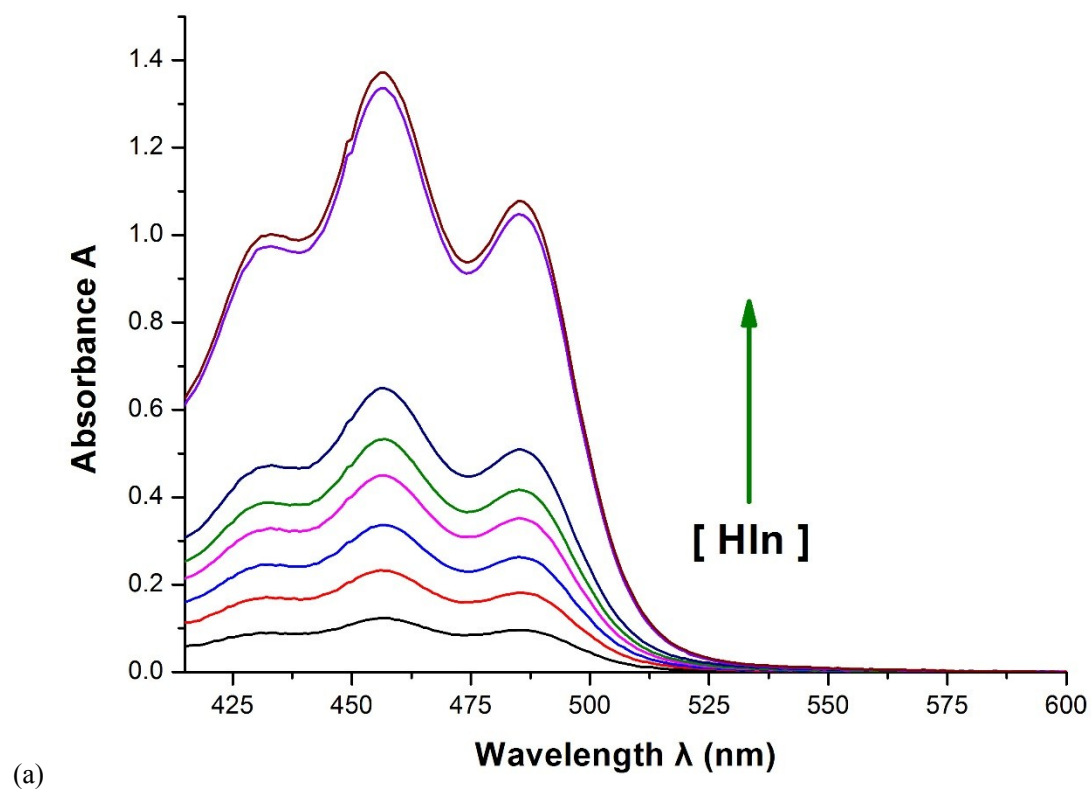

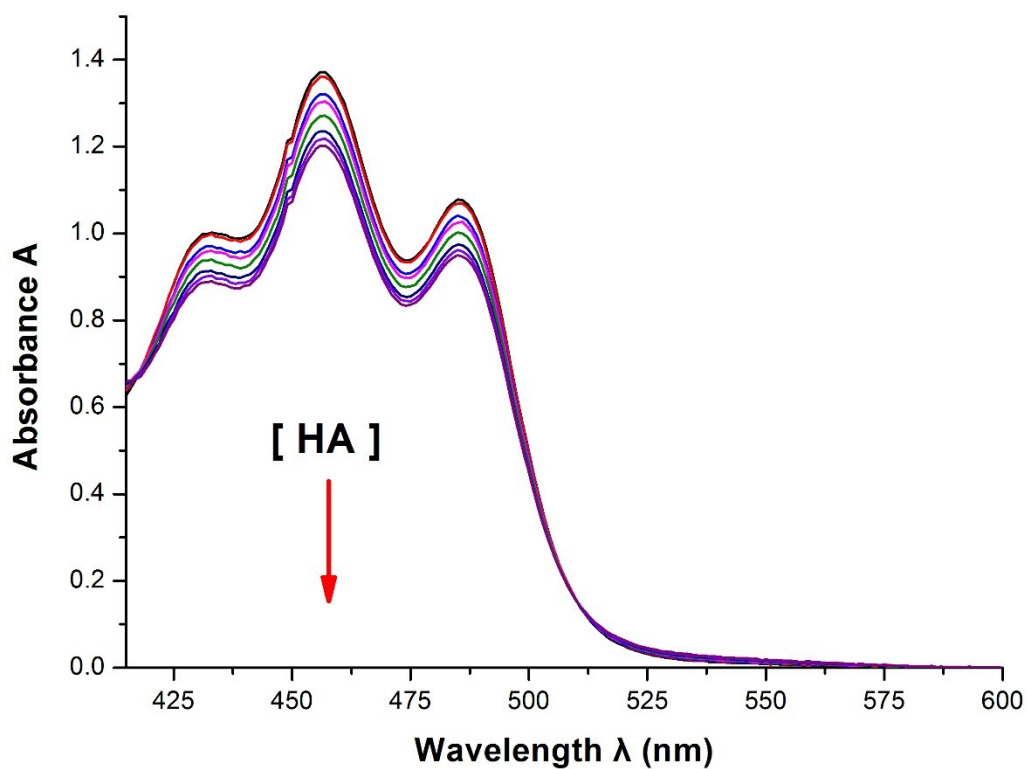

(b)

**Figure 10.** (a) Absorption spectra of the anion derived from **2,7-diBr-9-PhS-FH** for various added amounts of **2,7-diBr-9-PhS-FH** during the titration. (b) Absorption spectra of the anion derived from **2,7-diBr-9-PhS-FH** for various added amounts of catalyst **13** during the titration.

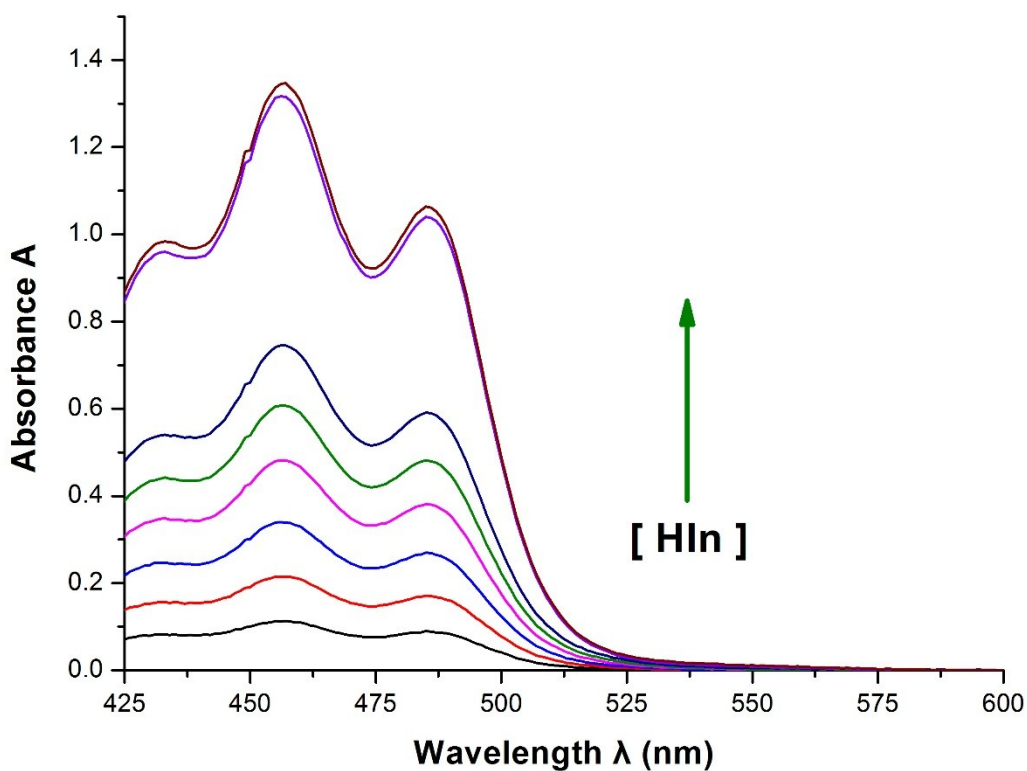

(a)

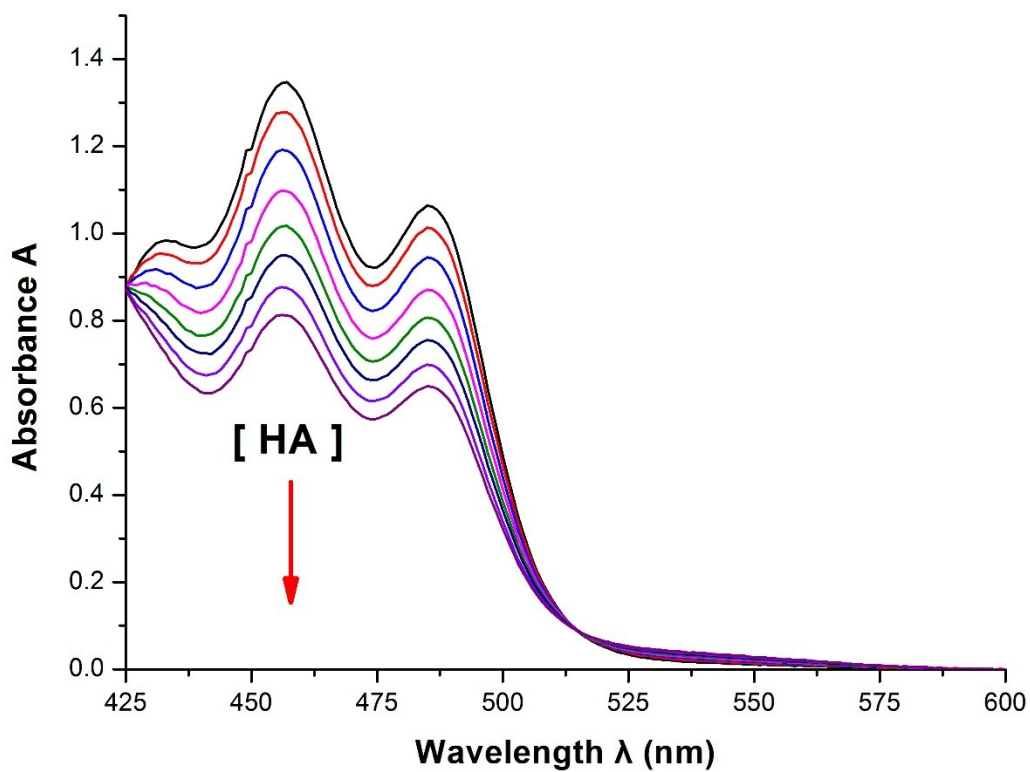

(b)

**Figure 11.** (a) Absorption spectra of the anion derived from **2,7-diBr-9-PhS-FH** for various added amounts of **2,7-diBr-9-PhS-FH** during the titration. (b) Absorption spectra of the anion derived from **2,7-diBr-9-PhS-FH** for various added amounts of catalyst **14** during the titration.

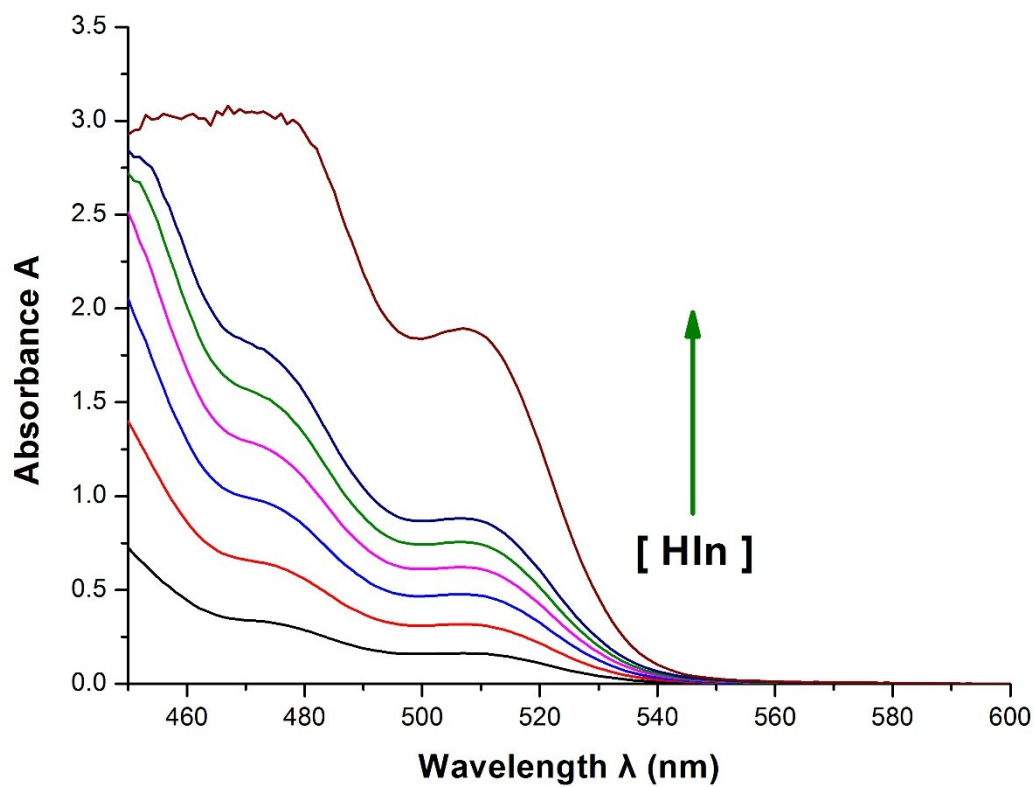

(a)

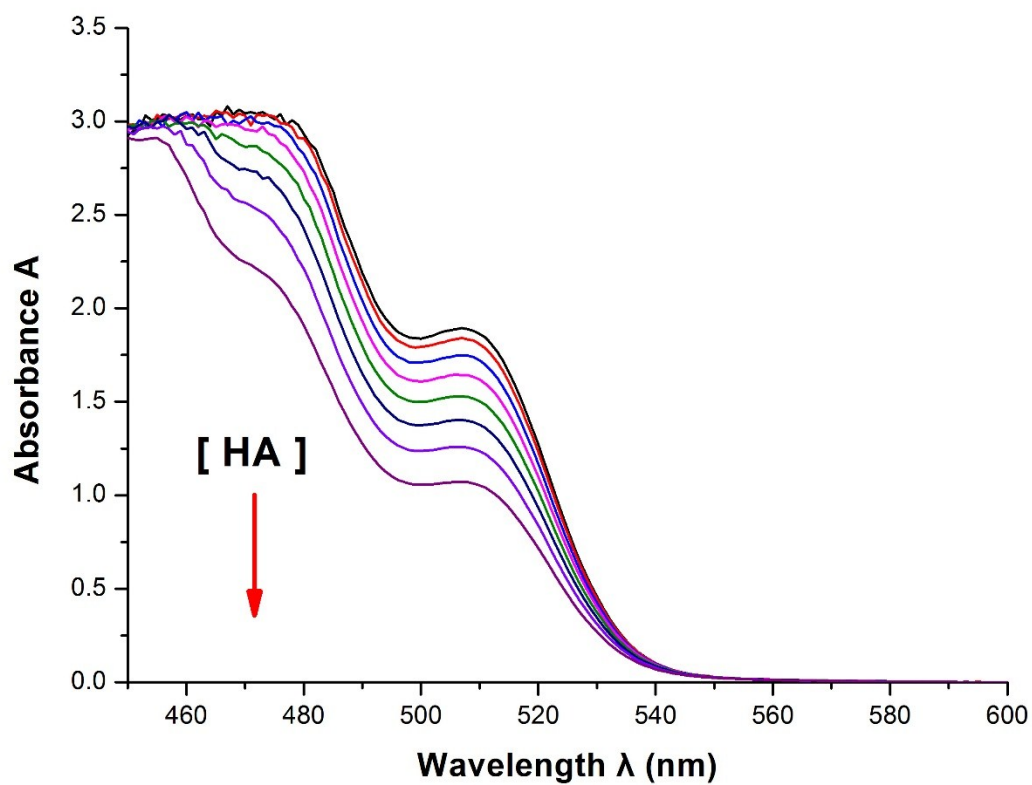

(b)

**Figure 12.** (a) Absorption spectra of the anion derived from 9-(3-Cl-Ph)-FH for various added amounts of 9-(3-Cl-Ph)-FH during the titration. (b) Absorption spectra of the anion derived from 9-(3-Cl-Ph)-FH for various added amounts of catalyst **15** during the titration.

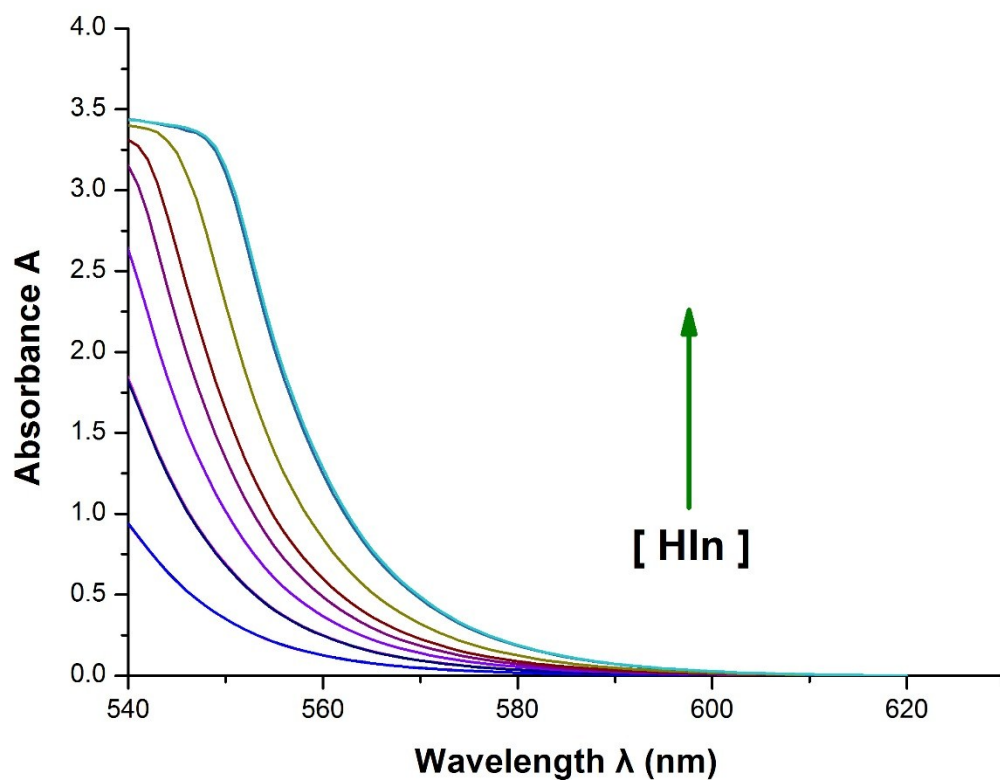

(a)

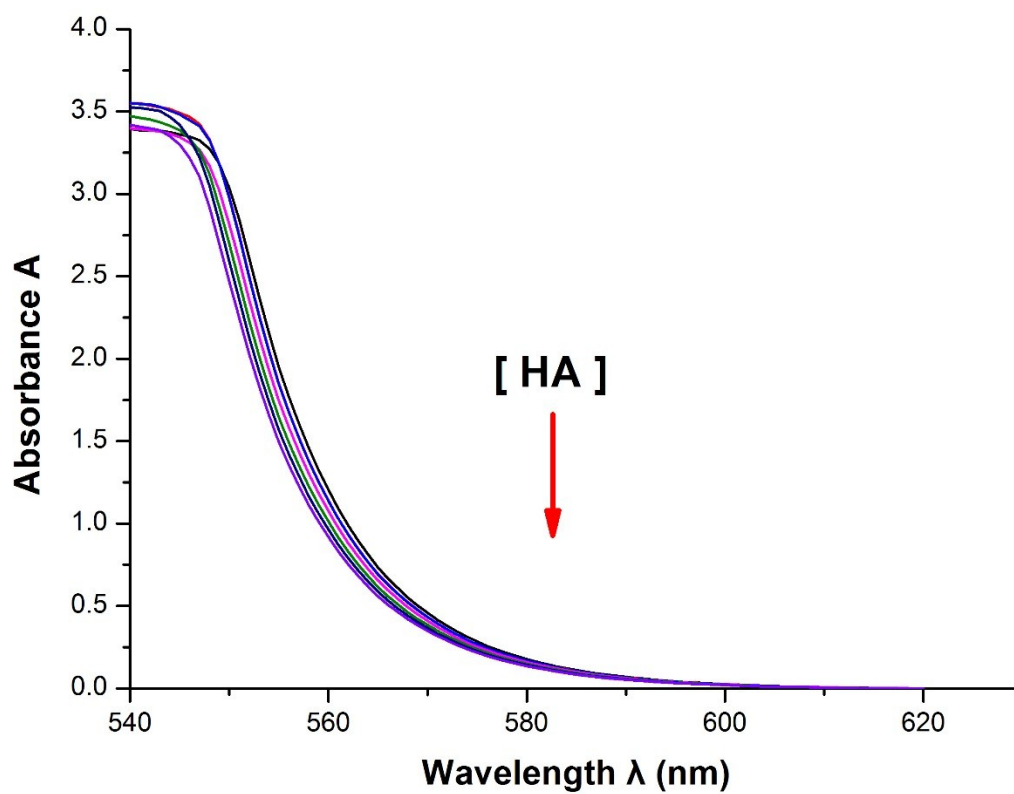

(b)<sub>i</sub>

**Figure 13.** (a) Absorption spectra of the anion derived from 9-(2-Cl-Ph)-NHN-FH for various added amounts of 9-(2-Cl-Ph)-NHN-FH during the titration. (b) Absorption spectra of the anion derived from 9-(2-Cl-Ph)-NHN-FH for various added amounts of catalyst **1** during the titration.
